# Supplementary material for: Cardiomyocyte SMAD4-Dependent TGF-β Signaling is Essential to Maintain Adult Heart Homeostasis
Source: PubMed Central journal article supplement — JACC Basic Transl Sci. 2019 Jan 16;4(1):41–53. doi: 10.1016/j.jacbts.2018.10.003 (PMC6390466; doi:10.1016/j.jacbts.2018.10.003), 2019-01-16
Supplement: mmc1.pdf [file mmc1.pdf]

# Online Figure 1

**A**

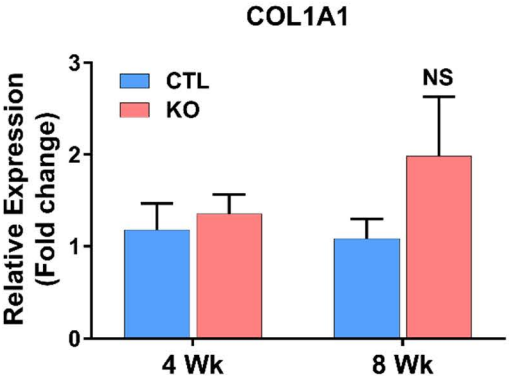

**B**

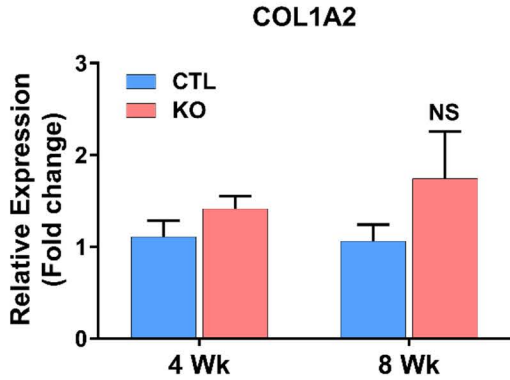

**C**

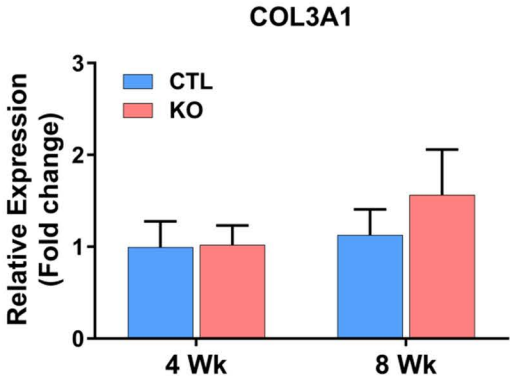

# Online Figure 2

4 Weeks

8 Weeks

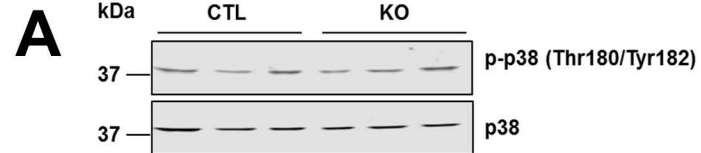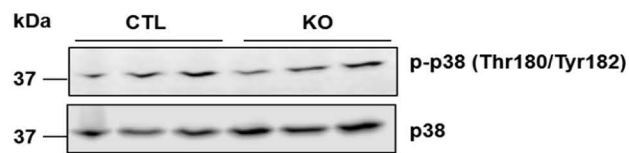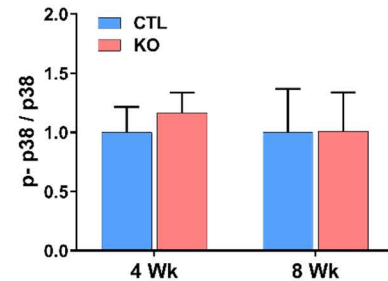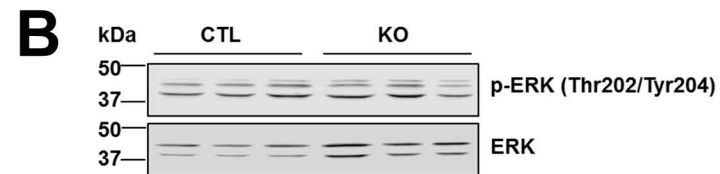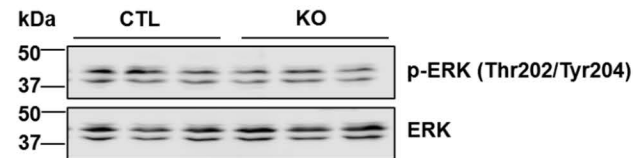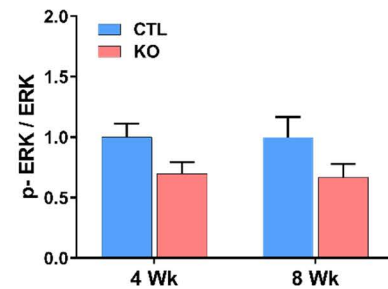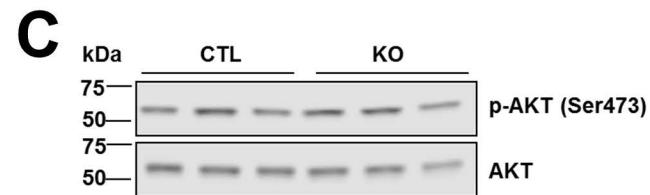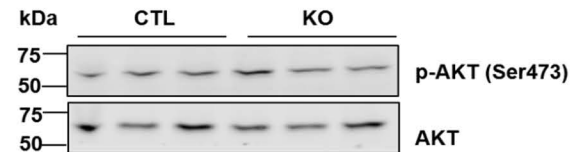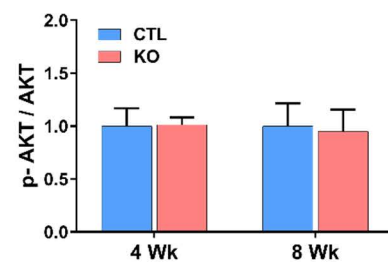

CTL (n=7), KO (n=7)

# Online Figure 3

## A: Integrin complex proteins

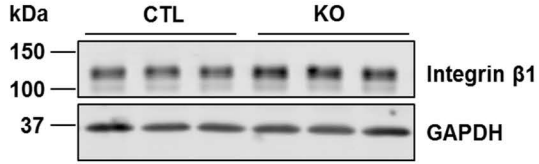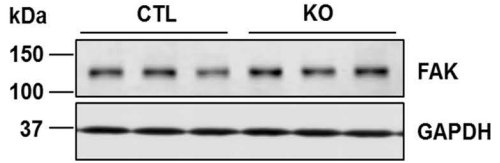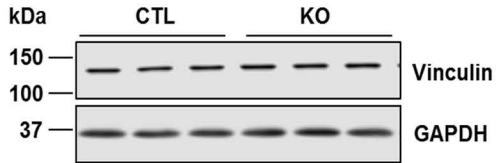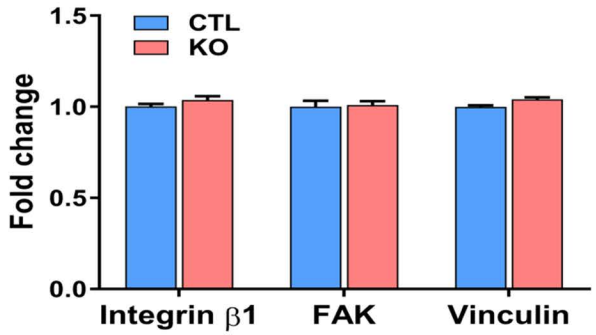

CTL (n=7), KO (n=7)

# Online Figure 3

## B: Adherens junction proteins

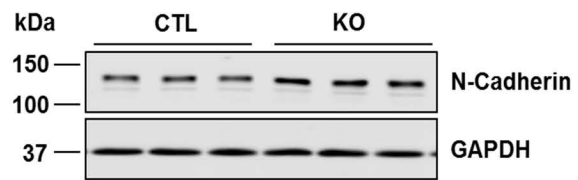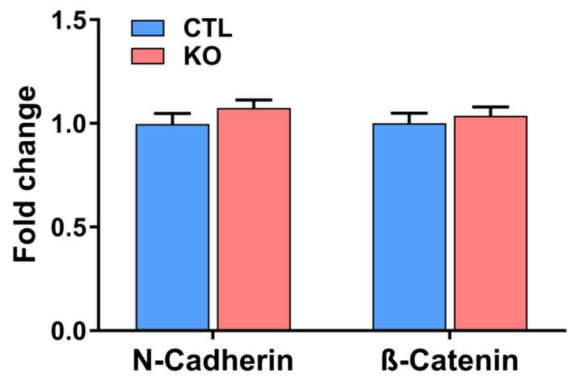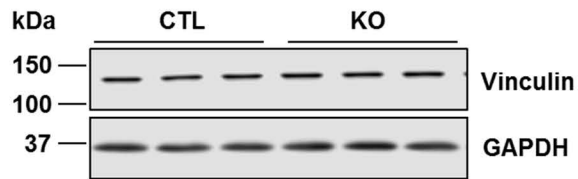

# Online Figure 3

## C: Gap Junction protein

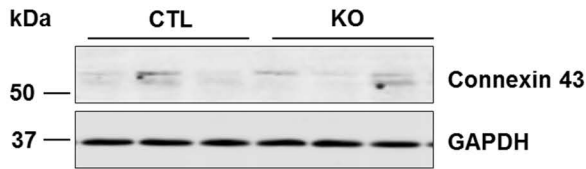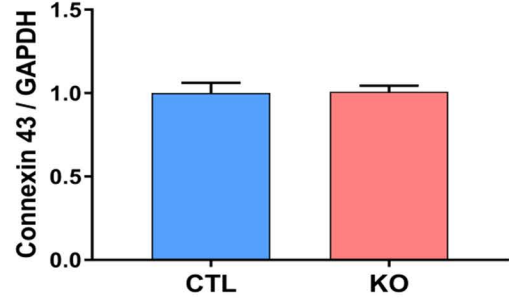

## D: Desmosome protein

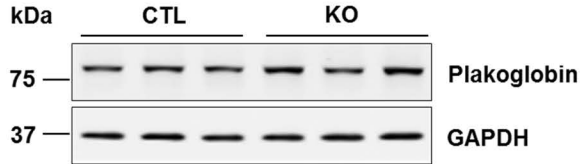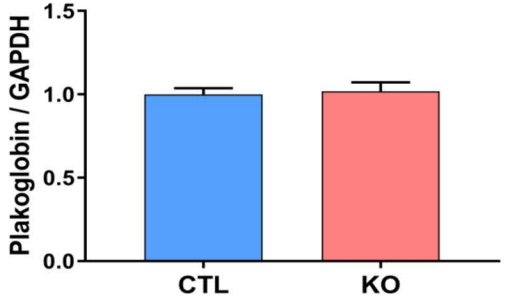

CTL (n=7), KO (n=7)

## **ONLINE FIGURE LEGENDS**

### **Online Figure 1. Analysis of cardiac fibrosis markers by qPCR method**

At the end of each time point qPCR analysis was performed to examine the mRNA levels of **A**, Collagen Type I Alpha 1 Chain (COL1A1). **B**, Collagen Type I Alpha 2 Chain (COL1A2). **C**, Collagen Type III Alpha 1 Chain (COL3A1).

### **Online Figure 2. CM-Specific SMAD4 Deletion Does Not Affect MAPK or AKT Signaling Pathways**

Western blot analysis of MAPK and AKT phosphorylation in CTL and SMAD4 KO hearts harvested at 4 weeks post-TAM treatment. Representative western blots and quantification **A**, p38 **B**, ERK1/2 **C**, AKT.

### **Online Figure 3. Effect of CM-Specific SMAD4 Deletion on Expression of Costameres and Intercalated Disk Proteins**

Proteins were harvested from CTL and SMAD4 KO hearts at 4 weeks post-TAM treatment and western blot analysis was performed. Representative western blots and quantification **A**, Integrin complex proteins **B**, Adherens junction proteins **C**, Gap Junction protein **D**, Desmosome protein. FAK=focal adhesion kinase.

## **ONLINE APPENDIX**

### **Mice**

To achieve conditional deletion of SMAD4 specifically in CM, SMAD4<sup>fl/fl</sup> mice (Stock No: 017462, The Jackson Laboratory) were crossed with mice carrying the tamoxifen (TAM) inducible  $\alpha$ -MHC promoter driven Mer-Cre-Mer transgene (Myh6-Cre<sup>+/+</sup>) (Stock No: 005657, The Jackson Laboratory). Also, Myh6-Cre<sup>+/+</sup> transgenic mice were crossed with C57BL/6 mice (Stock No: 000664, The Jackson Laboratory) to generate Myh6-Cre<sup>+/-</sup>. The SMAD4<sup>fl/fl</sup>/Cre<sup>+/-</sup>/TAM mice were the conditional knockouts (KO), whereas littermates SMAD4<sup>fl/fl</sup>/Cre<sup>-/-</sup>/TAM represented controls (CTL). Myh6-Cre<sup>+/-</sup>/TAM mice were used as no-flox Cre controls (MCM). The Institutional Animal Care and Use Committee of Vanderbilt University Medical Center approved all animal procedures and treatments used in this study (protocol # M1700133-00).

### **Echocardiography**

Transthoracic echocardiography was performed as described previously (1). In brief, mice were anesthetized by inhalation of isoflurane (1-1.5%). M-mode interrogation was performed with a MS400:18–38 MHz transducer (VisualSonics) in the parasternal short-axis view. Left ventricular internal dimension in diastole (LVID; d), left ventricular internal dimension in systole (LVID; s), left ventricular posterior wall thickness in diastole (LVPW; d), left ventricular posterior wall thickness in systole (LVPW; s), left ventricle ejection fraction (LVEF), left ventricle fractional shortening (LVFS), intraventricular septum dimension in systole (IVS; s), intraventricular septum dimension in diastole (IVS; d), heart rate (HR) values were obtained by analyzing data using the Vevo 2100 program.

## **Electrocardiography (ECG)**

Mice were anesthetized by inhalation of isoflurane (1-1.5%) and ECG leads were recorded with surface electrodes (ADInstruments). The mean values for each parameter were obtained by analyzing data using LabChart software (ADInstruments). Corrected QT (QT<sub>C</sub>) intervals were analyzed for an evaluation independent of heart rate. QT<sub>C</sub> was calculated with mean values and the Bazett's Formula (QT<sub>C</sub> = QT Interval/ $\sqrt{\text{RR interval}}$ ).

## **Histology**

Heart tissues were fixed in 4% paraformaldehyde, embedded in paraffin, and sectioned at 5  $\mu\text{m}$  thickness. Sections were stained with Hematoxylin-Eosin (HT1079, Sigma-Aldrich) or Masson Trichrome (HT15, Sigma-Aldrich) as per manufacturer's instruction. The images of LV region were captured using Zeiss AxioPlan2 microscope with AxioVision software. The quantification of LV fibrosis and cross-sectional area of cardiomyocytes (CSA) were determined with ImageJ software. At least 200-300 cardiomyocytes per heart (n=5 hearts per group) were taken for CSA measurement.

## **Terminal deoxynucleotidyl transferase-mediated dUTP nick end labeling (TUNEL) assay**

TUNEL assay was performed using In Situ Cell Death Detection Kit, TMR red (12156792910, Sigma-Aldrich) as per manufacturer's instructions. Briefly, the sections were deparaffinized and rehydrated using xylene and ethanol gradings, and permeabilized using Proteinase K solution. Sections were incubated with the reaction mixture containing TdT and TMR red labeled dUTP for 1 h at 37 °C. Stained sections were mounted in mounting medium and images were captured with a confocal microscope (Olympus FV1000). TUNEL-positive and 4',6-diamidino-2-



phenylindole (DAPI) stained nuclei were counted using the NIH ImageJ software. At least 500 nuclei were counted in each field.

### **Cardiomyocyte isolation and measurements of sarcomere shortening**

Adult mouse cardiomyocytes were isolated as described previously (2). For recordings, myocytes were placed in a chamber on the stage of an inverted microscope and perfused with a normal physiological Tyrode's solution containing (in mmol/L): 150 NaCl, 5.4 KCl, 1.2 MgCl<sub>2</sub>, 10 glucose, 2 Na-pyruvate, 1 CaCl<sub>2</sub> and 5 HEPES, pH 7.4. Myocytes were paced at 1 Hz with a MyoPacer field stimulator (IonOptix). Adult CM contractility measurements were made using sarcomere length (SarcLen) parameters and processed with IonWizard 6.0 software. The following parameters were analyzed: sarcomere peak shortening normalized to resting sarcomere length (%PS), maximal shortening velocity (-dL/dT) and re-lengthening velocity (+dL/dT).

### **Western blotting**

Western blotting was performed to evaluate protein levels. LV tissues were dissected from mouse heart and homogenized with cell lysis buffer (9803S, Cell Signaling Technology) having 50 mM Tris-HCl (pH7.4), 150 mM NaCl, 1mM EDTA, 0.25% sodium deoxycholate, 1% NP-40 and freshly supplemented Protease Inhibitor Cocktail (P8340, Sigma-Aldrich) and Phosphatase Inhibitor Cocktail (P0044, Sigma-Aldrich). Protein concentration was determined with Bio-Rad Protein Assay Dye Reagent Concentrate (500-0006, Bio-Rad). The equal amount of proteins were denatured in SDS-PAGE sample buffer, resolved by SDS-PAGE and transferred to Immobilon-P PVDF Membrane (IPVH00010, EMD Millipore). The membranes were blocked in Odyssey blocking buffer (927-40000, LI-COR Biosciences) for 1h at RT. Primary antibody incubations were performed at different dilutions as described in antibody list (Online Table 2).

All incubations for primary antibodies were done for overnight at 4°C and followed by incubation with secondary antibodies described in antibody list (Online Table 3) for 1h at RT. Proteins were visualized with the Odyssey Infrared Imaging System (LI-COR Biosciences). Band intensity was quantified by NIH Image J software.

### **RNA deep sequencing**

Total RNA was extracted from ventricles of SMAD4 KO and littermate controls (n=4/group) using RNeasy Mini kit (74104, Qiagen) as per the manufacturer's instructions. RNA integrity was confirmed using Agilent Bioanalyzer. RNA sequencing (RNA-Seq) was performed by the Vanderbilt Technologies for Advanced Genomics (VANTAGE) core. RNA libraries were constructed using the Illumina TruSeq Stranded Total RNA kit. Libraries were sequenced using Illumina HiSeq 3000 on paired-end-75 flow cell runs at ~35M PF reads per sample. Raw reads (fastq files) were uploaded to the Partek Flow server and pre-alignment quality assessment performed. Mean base-call quality scores were above Phred-like values of 36 in all positions of all samples, and no hard trimming of the reads was necessary. Sequences were aligned to the mm10 assembly of the mouse genome using STAR 2.5.3a and resulting summary of reads quantified at the gene level to Ensemble transcripts 83 using Partek's expectation maximization (E/M) annotation model. Gene counts were normalized to total read count per sample and then log-transformed (with an offset of 0.0001).

To identify differentially expressed genes, statistical analysis was performed using Partek's Gene Specific Analysis (GSA) multimodel estimation algorithm, which identifies the statistical model that is the best for each gene among all the selected models (lognormal, Poisson, etc.), and then uses that best model to calculate p-value and fold change. Hierarchical clustering was performed

on normalized and log transformed counts using Partek Genomics Suite 6.6. Statistical analyses (including correction for multiple hypothesis testing) for identification of overrepresented ontologies, functions, and pathways were performed using DAVID (<https://david.ncifcrf.gov>), a freely available online-based functional analysis tool to identify relevant gene sets.

### **RNA extraction and quantitative PCR analysis**

Total RNA was extracted from heart tissue using the RNeasy Mini Kit (74104, Qiagen) according to manufacturer's protocol. cDNA was synthesized using the iScript cDNA synthesis kit (170-8891, Bio-Rad) following manufacturer's instructions. Gene expression was analyzed by quantitative PCR (qPCR) using the TaqMan Gene Expression Master Mix (4369016, Applied Biosystems) and TaqMan gene expression assays (Applied Biosystems) on a Bio-Rad CFX96 Real-Time PCR Detection machine. Details of TaqMan gene expression assays used in this study is proved as Online Table 4. Relative gene expression was determined by using the comparative  $C_T$  method ( $2^{-\Delta\Delta C_T}$ ) and was represented as fold change. Briefly, the first  $\Delta C_T$  is the difference in threshold cycle between the target and reference genes:  $\Delta C_T = C_T$  (a target gene X) –  $C_T$  (18S rRNA) while  $\Delta\Delta C_T$  is the difference in  $\Delta C_T$  as described in the above formula between the CTL and KO group, which is  $= \Delta C_T$  (KO target gene X) –  $\Delta C_T$  (CTL target gene X). Fold change is calculated using  $2^{-\Delta\Delta C_T}$  equation (3).

### **References:**

1. Lal H, Zhou J, Ahmad F et al. Glycogen synthase kinase-3alpha limits ischemic injury, cardiac rupture, post-myocardial infarction remodeling and death. *Circulation* 2012;125:65-75.

2. O'Connell TD, Rodrigo MC, Simpson PC. Isolation and culture of adult mouse cardiac myocytes. *Methods in molecular biology* 2007;357:271-96.
3. Schmittgen TD, Livak KJ. Analyzing real-time PCR data by the comparative C(T) method. *Nat Protoc* 2008;3:1101-8.

Online Table 1: Echocardiographic measurements

|                   | <b>LVID, d<br/>(mm)</b> | <b>LVID, s<br/>(mm)</b> | <b>LVPW, d<br/>(mm)</b> | <b>LVPW, s<br/>(mm)</b> | <b>IVS, d<br/>(mm)</b> | <b>IVS, s<br/>(mm)</b> | <b>LVEF<br/>(%)</b>     | <b>LVFS<br/>(%)</b>     | <b>HR<br/>(bpm)</b> |
|-------------------|-------------------------|-------------------------|-------------------------|-------------------------|------------------------|------------------------|-------------------------|-------------------------|---------------------|
| <b>t=Baseline</b> |                         |                         |                         |                         |                        |                        |                         |                         |                     |
| <b>CTL</b>        | 4.05±0.18               | 2.69±0.16               | 0.83±0.04               | 1.13±0.07               | 0.80±0.02              | 1.09±0.03              | 55.29±4.03              | 28.59±2.68              | 444±16              |
| <b>MCM</b>        | 3.75±0.12               | 2.99±0.13               | 0.83±0.05               | 1.08±0.03               | 0.88±0.06              | 1.25±0.05              | 51.67±1.19              | 26.08±0.76              | 442±6               |
| <b>KO</b>         | 3.81±0.11               | 2.73±0.12               | 0.77±0.03               | 1.10±0.05               | 0.80±0.02              | 1.07±0.02              | 55.47±1.93              | 28.45±1.23              | 455±20              |
| <b>t= 4 weeks</b> |                         |                         |                         |                         |                        |                        |                         |                         |                     |
| <b>CTL</b>        | 4.04±0.17               | 3.07±0.12               | 0.95±0.08               | 1.12±0.07               | 0.91±0.03              | 1.23±0.05              | 51.08±1.77              | 25.80±1.07              | 404±15              |
| <b>MCM</b>        | 4.13±0.15               | 3.14±0.14               | 1.04±0.05               | 1.19±0.07               | 0.88±0.03              | 1.17±0.05              | 45.43±2.17              | 22.34±1.26              | 470±22              |
| <b>KO</b>         | 5.06±0.10****           | 2.73±0.12****           | 0.82±0.05*              | 0.92±0.05               | 0.80±0.02              | 1.02±0.03*             | 29.25±1.82**            | 13.82±0.93*             | 381±3               |
| <b>t= 8 weeks</b> |                         |                         |                         |                         |                        |                        |                         |                         |                     |
| <b>CTL</b>        | 3.79±0.11               | 3.10±0.12               | 0.84±0.04               | 1.09±0.06               | 0.80±0.04              | 1.26±0.03              | 55.17±2.82              | 28.89±1.97              | 499±20              |
| <b>MCM</b>        | 4.35±0.11               | 3.04±0.13               | 0.88±0.02               | 1.06±0.04               | 0.93±0.02              | 1.17±0.05              | 41.29±3.44 <sup>#</sup> | 19.94±1.92 <sup>#</sup> | 406±15              |
| <b>KO</b>         | 5.09±0.11***            | 4.54±0.15****           | 0.80±0.03               | 0.84±0.04               | 0.73±0.02**            | 1.02±0.03****          | 23.37±3.38**            | 10.93±1.69*             | 491±24              |

Echocardiographic measurements. (CTL: n=13, MCM: n=7, KO: n=11) Data are mean ± SEM.

LVID, d= left ventricular internal dimension in diastole, \*\*\*\* $P<0.0001$  vs. MCM, \*\*\* $P=0.0008$  vs. MCM.; LVID, s= left ventricular internal dimension in systole, \*\*\*\* $P<0.0001$  vs. MCM.; LVPW, d=left ventricular posterior wall thickness in diastole, \* $P=0.0265$  vs. MCM; LVPW, s=left ventricular posterior wall thickness in systole; IVS, d=intraventricular septum dimension in diastole, \*\* $P=0.0027$  vs. MCM; IVS, s=intraventricular septum dimension in systole, \*\*\*\* $P<0.0001$  vs. MCM, \* $P=0.0466$  vs. MCM; LVEF=left ventricle ejection fraction, \*\* $P=0.0035$  vs. MCM (t=4 Wk), \*\* $P=0.0014$  vs. MCM, # $P=0.0161$  vs. CTL (t=8 Wk); LVFS=left ventricle fractional shortening, \* $P=0.0220$  vs. MCM (t=4 Wk), \* $P=0.0184$  vs. MCM & # $P=0.0096$  vs. CTL (t=8 Wk); HR=heart rate; bpm=beats/min; Wk=Week

Online Table 2: Primary antibodies and dilutions used for Western blot analysis

| <b>S.No.</b> | <b>Antibody</b>                 | <b>Vendor</b>             | <b>Catalog No.</b> | <b>Dilution</b> |
|--------------|---------------------------------|---------------------------|--------------------|-----------------|
| 1            | SMAD4                           | abcam                     | ab40759            | 1:1000          |
| 2            | p-ERK1/2 (Thr202/Tyr204)        | Cell Signaling Technology | 4370S              | 1:1000          |
| 3            | ERK1/2                          | Santa Cruz Biotechnology  | sc-93              | 1:1000          |
| 4            | p-AKT (Ser473)                  | Cell Signaling Technology | 4060               | 1:1000          |
| 5            | AKT                             | Cell Signaling Technology | 9272               | 1:1000          |
| 6            | p-p38 (Thr180/Tyr182)           | Cell Signaling Technology | 9211s              | 1:1000          |
| 7            | p38                             | Santa Cruz Biotechnology  | sc-535             | 1:1000          |
| 8            | p-Phospholamban(p-PLN) (Thr17)  | Badrilla                  | A010-13            | 1:5000          |
| 9            | Phospholamban                   | Cell Signaling Technology | 14562              | 1:1000          |
| 10           | SERCA2a                         | Cell Signaling Technology | 9580               | 1:1000          |
| 11           | p-Troponin I (p-TnI) (Ser23/24) | Cell Signaling Technology | 4004               | 1:1000          |
| 12           | Troponin I                      | Cell Signaling Technology | 4002               | 1:1000          |
| 13           | Integrin $\beta$ 1              | abcam                     | 179471             | 1:1000          |

Online Table 2 continued: Primary antibodies and dilutions used for Western blot analysis

| <b>S.No.</b> | <b>Antibody</b>                 | <b>Vendor</b>                | <b>Catalog No.</b> | <b>Dilution</b> |
|--------------|---------------------------------|------------------------------|--------------------|-----------------|
| 14           | FAK                             | Cell Signaling Technology    | 3285               | 1:1000          |
| 15           | Vinculin                        | Sigma                        | V9131              | 1:200           |
| 16           | Connexin 43                     | Thermo Fisher Scientific     | 13-8300            | 1:500           |
| 17           | $\beta$ -Catenin                | Cell Signaling Technology    | 8814               | 1:1000          |
| 18           | N-Cadherin                      | BD Transduction Laboratories | 610920             | 1:250           |
| 19           | $\gamma$ -Catenin (plakoglobin) | BD Transduction Laboratories | 610253             | 1:8000          |
| 20           | GAPDH                           | Fitzgerald                   | 10R-G109a          | 1:10000         |
| 21           | cMyBP-C                         | Ref (1)                      |                    | 1:2500          |

Online Table 3: Secondary antibodies and dilutions used for Western blot analysis

| <b>S.No.</b> | <b>Antibody</b>                  | <b>Vendor</b>      | <b>Catalog No.</b> | <b>Dilution</b> |
|--------------|----------------------------------|--------------------|--------------------|-----------------|
| 1            | IRDye 680LT Goat anti-Mouse IgG  | LI-COR Biosciences | 926-68020          | 1:3000          |
| 2            | IRDye 680LT Goat anti-Rabbit IgG | LI-COR Biosciences | 926-68021          | 1:3000          |
| 3            | IRDye® 800CW Goat anti-Mouse IgG | LI-COR Biosciences | 925-32210          | 1:3000          |
| 4            | IRDye® 800CW Goat anti-Rabbit    | LI-COR Biosciences | 925-32211          | 1:3000          |



Online Table 4: TaqMan gene expression assays and control used for qPCR analysis

| <b>S.No.</b> | <b>Gene</b>                            | <b>Assay ID</b> | <b>Catalog No.</b> | <b>Vendor</b>      |
|--------------|----------------------------------------|-----------------|--------------------|--------------------|
| 1            | Col1a1                                 | Mm00801666_g1   | 4331182            | Applied Biosystems |
| 2            | Col1a2                                 | Mm00483888_m1   | 4331182            | Applied Biosystems |
| 3            | Col3a1                                 | Mm00802300_m1   | 4331182            | Applied Biosystems |
| 4            | Kcna2                                  | Mm00434584_s1   | 4331182            | Applied Biosystems |
| 5            | Kcnd2                                  | Mm01161732_m1   | 4331182            | Applied Biosystems |
| 6            | Kcne1                                  | Mm04207514_m1   | 4331182            | Applied Biosystems |
| 7            | Kcnev2                                 | Mm00807577_m1   | 4331182            | Applied Biosystems |
| 8            | Scn4b                                  | Mm01175562_m1   | 4331182            | Applied Biosystems |
| 9            | Cacng6                                 | Mm01325846_m1   | 4331182            | Applied Biosystems |
| 10           | Clcn1                                  | Mm00658624_m1   | 4331182            | Applied Biosystems |
| 11           | Eukaryotic 18S rRNA Endogenous Control |                 | 4319413E           | Applied Biosystems |

Reference:

1. Copeland O, Sadayappan S, Messer AE, Steinen GJ, van der Velden J, Marston SB. Analysis of cardiac myosin binding protein-C phosphorylation in human heart muscle. *J Mol Cell Cardiol* 2010;49:1003-11.
